# Supplementary material for: Designing highly tunable laminin-inspired bioactive peptide hydrogel-based biomaterials for directing cellular response
Source: Royal Society of Chemistry journal article supplement (doi:10.1039/d5tb01989c), 2025-12-09
Supplement: d5tb01989c1.pdf [file d5tb01989c1.pdf]

## Supplementary Information

### Designing highly tunable laminin inspired bioactive peptide hydrogel based biomaterials for directing cellular response

Ranit Bhandary <sup>a</sup>, Sourav Sen <sup>a</sup>, Sweta Mohanty <sup>a</sup> and Sangita Roy <sup>a\*</sup>

<sup>a</sup> Institute of Nano Science and Technology (INST), Sector 81, Knowledge City, Mohali  
140306, Punjab, India

\*Email: [sangita@inst.ac.in](mailto:sangita@inst.ac.in)

#### Table of contents

**Table S1:** LC-MS analysis data of the peptide from Chemdraw (Ultra 12.0) and ESI-MS.

**Table S2:** Gelation behavior of the laminin-inspired peptide by co-solvent approach using 5% DMSO with different peptide concentration.

**Table S3:** LC-MS analysis data of the scrambled peptide from Chemdraw (Ultra 12.0) and ESI-MS.

**Table S4:** Gelation behavior of the scrambled peptide sequence by co-solvent approach using 5% DMSO with different peptide concentration.

**Table S5:** Table of fiber diameter of the peptide hydrogels prepared at different concentrations.

**Table S6:** Water contact angle (WCA) values at different time points for the peptide hydrogels of different concentrations.

**Table S7:** The values of cell shape index (CSI) and area covered by fibroblast cells on control as well as peptide hydrogel scaffold as determined by F-actin staining.

**Table S8:** The values of cell shape index (CSI) and area covered by neuronal cells on control as well as peptide hydrogel scaffold as determined by  $\beta$ -tubulin staining.

**Figure S1:** Reverse phase HPLC chromatogram of Nap-IVVSIVNGR.

**Figure S2:** LC-MS spectra of laminin inspired peptide sequence analyzed using ESI-MS technique.

**Figure S3:** FTIR spectra of 25 mM Nap-IVVSIVNGR hydrogels (prepared in 5% DMSO/water) after solvent exchange showing diminished sulfoxide peak at 1020  $\text{cm}^{-1}$ .

**Figure S4:** LC-MS spectra of scrambled peptide analyzed using ESI-MS technique.

**Figure S5:** Reverse phase HPLC chromatogram of scrambled peptide sequence Nap-SVGRINVIV.

**Figure S6:** CD spectra of scrambled peptide hydrogel at different concentrations.

**Figure S7:** Comparison of the CD spectra of a) Nap-IVVSIVNGR and b) Nap-SVGRINVIV (scrambled peptide) at different concentration.

**Figure S8:** FTIR spectra of Nap-IVVSIVNGR peptide monomer powder along with freeze dried peptide hydrogels prepared at different concentrations.

**Figure S9:** Secondary structure evaluation of the scrambled hydrogels at different peptide concentrations by various spectroscopic techniques: (a) FTIR- spectroscopic measurement, (b) ThT binding assay.

**Figure S10:** Representative fluorescence emission spectra of peptide amphiphile in sol and gel states, indicating self-assembly by the quenched monomeric emission of the naphthoxy group in the gel state.

**Figure S11:** a) Tht binding assay and b) Congo red binding study of the peptide hydrogels at different concentrations.

**Figure S12:** Fluorescence microscopic images of the ThT bound peptide hydrogels at different concentrations (a) ThT Control, (b) 20 mM, (c) 25 mM, and (d) 30 mM.

**Figure S13:** FESEM images of the peptide hydrogels at different peptide concentrations (a) 20 mM, (b) 25 mM, and (c) 30 mM Nap-IVVSIVNGR.

**Figure S14:** Morphological analysis of Nap-SVGRINVIV scrambled peptide hydrogels at different concentrations. TEM images of the gels prepared at: (a) 20 mM, (b) 25 mM, and (c) 30 mM of peptide concentration. Scale bar is 200 nm.

**Figure S15:** Morphological analysis of Nap-SVGRINVIV scrambled peptide hydrogels at different concentrations. FESEM images of the gels prepared at: (a) 20 mM, (b) 25 mM, and (c) 30 mM of peptide concentration. Scale bar is 100 nm.

**Figure S16:** Strain sweep analysis of laminin-inspired peptide hydrogels at different concentrations (a) 20 mM, (b) 25 mM, and (c) 30 mM.

**Figure S17:** Mechanical strength analysis of the scrambled hydrogels at different concentration using a frequency sweep experiment.

**Figure S18:** (a) Time-dependent variation in the water contact angle of Nap-IVVSIVNGR hydrogels. Images of the water droplets after landing on surfaces of 20 mM hydrogel at (b) 5 s, (c) 50s, 25 mM hydrogel at (d) 5 s, (e) 50 s, 30 mM hydrogel at (f) 5 s, (g) 50 s.

**Figure S19:** Determination of cellular viability of the scrambled peptide and comparison of cellular viability with the laminin inspired peptide Nap-IVVSIVNGR: Cellular viability of

hydrogel on (a) L929 cells, (b) SH-SY5Y cells, and (c) Bright field images of both the cells in control and after 24h following treatment with peptide at 0.88 mM concentration.

**Figure S20:** Cellular growth and proliferation study of the peptide at subgelation concentration on (a) L929 cells, (b) SH-SY5Y cells.

**Figure S21:** Cellular growth and proliferation study of the scrambled peptide hydrogels on (a) L929 cells, (b) SH-SY5Y cells.

**Figure S22:** 3D stability study of the hydrogels in PBS having different peptide concentrations at different time points.

**Figure S23:** Confocal laser scanning microscopy images of SH-SY5Y cells in 3D cell culture conditions on (a) Control, (b) 20 mM Nap-IVVSIVNGR hydrogel, (c) 25 mM Nap-IVVSIVNGR hydrogel, (d) 30 mM Nap-IVVSIVNGR hydrogel. Scale bar is 200  $\mu$ m, Z-stack rendering images of the L929 cells after live/dead staining in the 3-D cell culture conditions in case of (e) Control, (f) 20 mM Nap-IVVSIVNGR hydrogel, (g) 25 mM Nap-IVVSIVNGR hydrogel, (h) 30 mM Nap-IVVSIVNGR hydrogel. The scale bar is 200  $\mu$ m.

**Table S1:** LC-MS analysis data of the peptide from Chemdraw (Ultra 12.0) and ESI-MS.

| Peptide Nap-IVVSIVNGR                                           | Calculated molecular weight (Chem Draw Ultra 12.0) | Found m/z value (M+H) <sup>+</sup> (ESI -MS) |
|-----------------------------------------------------------------|----------------------------------------------------|----------------------------------------------|
| C <sub>54</sub> H <sub>86</sub> N <sub>14</sub> O <sub>13</sub> | 1139.37                                            | 1140.65                                      |

**Table S2:** Gelation behavior of the laminin-inspired peptide by co-solvent approach using 5% DMSO with different peptide concentration.

| Concentration of laminin-inspired peptide (mM) | Gelation time | Optical images of the gels formed at different concentrations.                        |
|------------------------------------------------|---------------|---------------------------------------------------------------------------------------|
| 2                                              | No Gelation   | 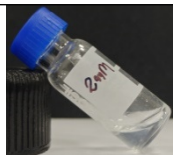   |
| 5                                              | No Gelation   |   |
| 10                                             | No Gelation   |  |
| 20                                             | 72 h          |  |
| 25                                             | 48 h          |  |

|    |      |                                                                                     |
|----|------|-------------------------------------------------------------------------------------|
| 30 | 24 h | 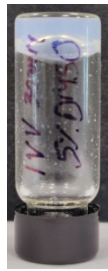 |
|----|------|-------------------------------------------------------------------------------------|

**Table S3:** LC-MS analysis data of the scrambled peptide from Chemdraw (Ultra 12.0) and ESI-MS.

| Peptide Nap-SVGRINVIV                                           | Calculated molecular weight (Chem Draw Ultra 12.0) | Found m/z value (ESI -MS) | Found m/z value (M+H) <sup>+1</sup> (ESI -MS) | Found m/z value (M+2H) <sup>+2</sup> (ESI -MS) |
|-----------------------------------------------------------------|----------------------------------------------------|---------------------------|-----------------------------------------------|------------------------------------------------|
| C <sub>54</sub> H <sub>86</sub> N <sub>14</sub> O <sub>13</sub> | 1139.37                                            | 1137.65                   | 1138.65                                       | 1139.66                                        |

**Table S4:** Gelation behavior of the scrambled peptide sequence by co-solvent approach using 5% DMSO with different peptide concentration.

| Concentration of scrambled peptide (mM) | Gelation time | Optical images of the gels formed at different concentrations.                        |
|-----------------------------------------|---------------|---------------------------------------------------------------------------------------|
| 20                                      | 72 h          |  |
| 25                                      | 48 h          |  |

|    |      |                                                                                     |
|----|------|-------------------------------------------------------------------------------------|
| 30 | 24 h |  |
|----|------|-------------------------------------------------------------------------------------|

**Table S5:** Table displaying fiber diameter of the nanofibrous network of the peptide hydrogels prepared at different concentrations as revealed from TEM images.

| Concentration of Nap-IVVSIVNGR peptide (mM) | Fiber Diameter (nm) |
|---------------------------------------------|---------------------|
| 20                                          | $10.46 \pm 1.72$    |
| 25                                          | $9.85 \pm 1.15$     |
| 30                                          | $8.16 \pm 0.82$     |

**Table S6:** Water contact angle (WCA) values at different time points for the peptide hydrogels of different concentrations.

| Time Points (Sec) | Water contact angle at different peptide concentration (°) |       |       |
|-------------------|------------------------------------------------------------|-------|-------|
|                   | 20 mM                                                      | 25 mM | 30 mM |
| 5                 | 32.29                                                      | 34.57 | 30.91 |
| 10                | 31.26                                                      | 30.40 | 26.05 |
| 20                | 29.64                                                      | 27.08 | 24.64 |
| 30                | 29.75                                                      | 25.62 | 24.15 |
| 40                | 29.74                                                      | 23.81 | 23.38 |
| 50                | 28.30                                                      | 23.48 | 22.85 |

**Table S7:** The values of cell shape index (CSI) and area covered by fibroblast cells on control as well as peptide hydrogel scaffold as determined by F-actin staining.

| Peptide Concentration (mM) | CSI Values      | Area Covered ( $\mu\text{m}^2$ ) |
|----------------------------|-----------------|----------------------------------|
| Control                    | $0.61 \pm 0.05$ | $309.58 \pm 38.73$               |
| 20                         | $0.75 \pm 0.07$ | $273.60 \pm 33.82$               |
| 25                         | $0.45 \pm 0.03$ | $312.35 \pm 31.50$               |
| 30                         | $0.54 \pm 0.05$ | $389.13 \pm 34.63$               |

**Table S8:** The values of cell shape index (CSI) and area covered by neuronal cells on control as well as peptide hydrogel scaffold as determined by  $\beta$ -tubulin staining.

| Peptide Concentration (mM) | CSI Values      | Area Covered ( $\mu\text{m}^2$ ) |
|----------------------------|-----------------|----------------------------------|
| Control                    | $0.79 \pm 0.05$ | $267.93 \pm 33.40$               |
| 20                         | $0.90 \pm 0.03$ | $194.39 \pm 36.04$               |
| 25                         | $0.87 \pm 0.05$ | $292.93 \pm 26.50$               |
| 30                         | $0.82 \pm 0.02$ | $349.69 \pm 27.24$               |

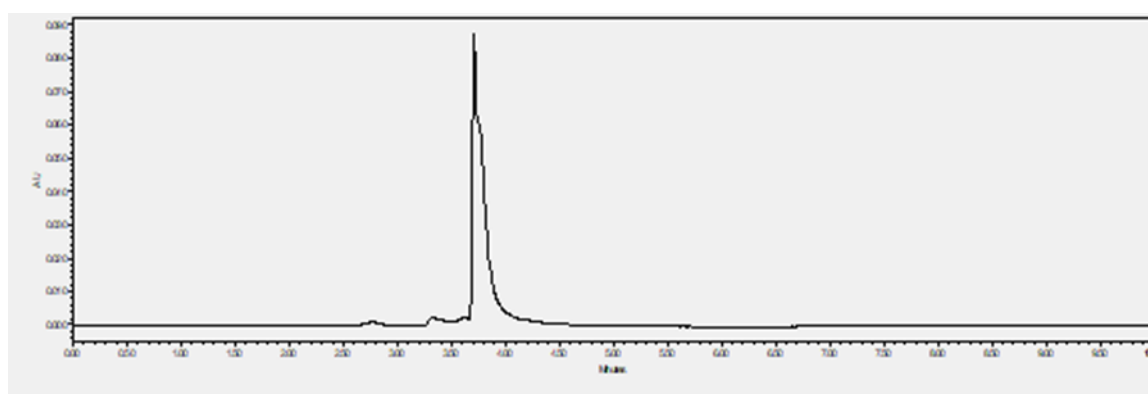

**Figure S1:** Reverse phase HPLC chromatogram of Nap-IVVSIVNGR.

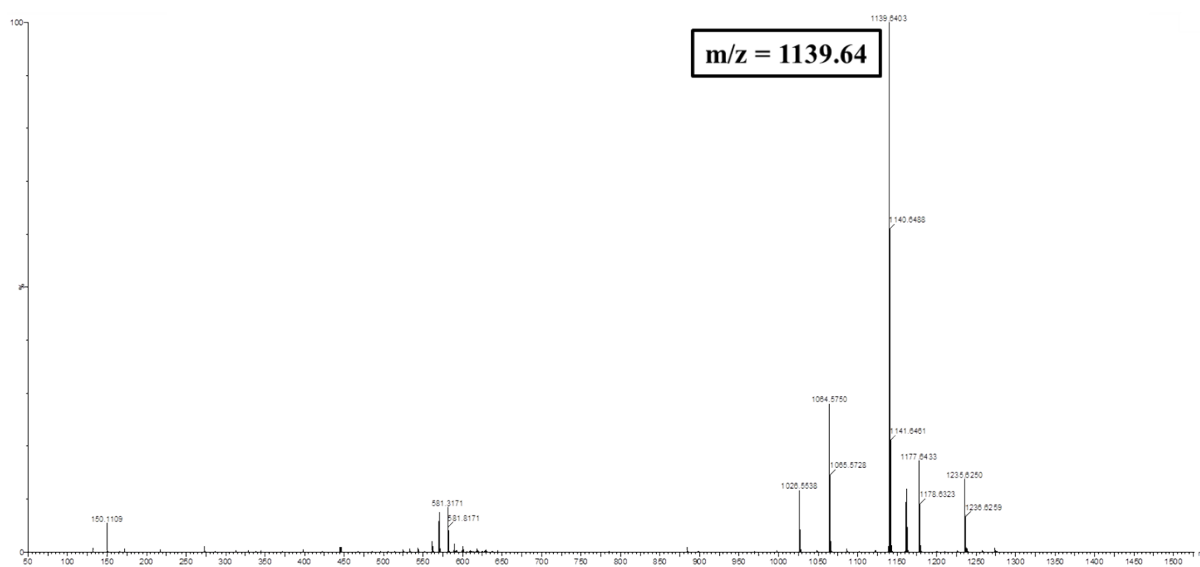

**Figure S2:** LC-MS spectra of laminin inspired peptide sequence analyzed using ESI-MS technique.

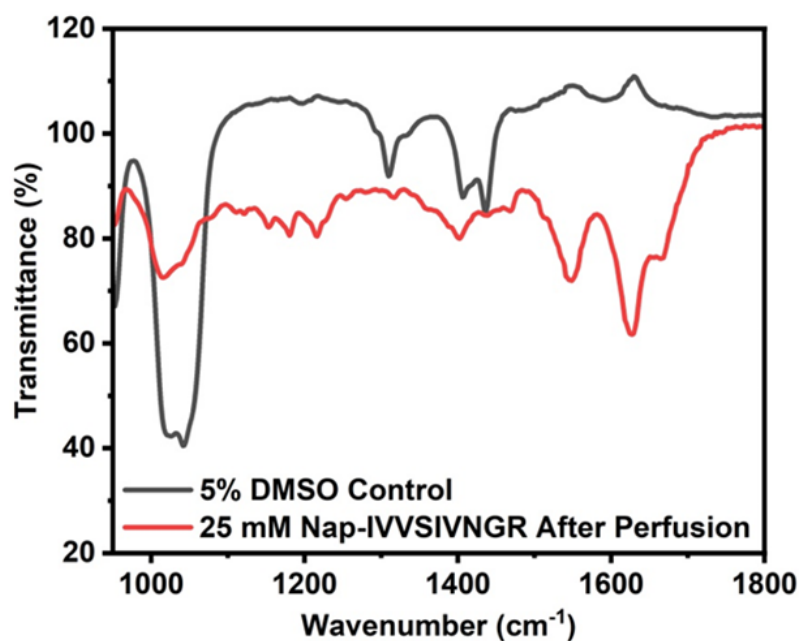

**Figure S3:** FTIR spectra of 25 mM Nap-IVVSIVNGR hydrogels (prepared in 5% DMSO/water) after solvent exchange showing diminished sulfoxide peak at 1020 cm<sup>-1</sup>.

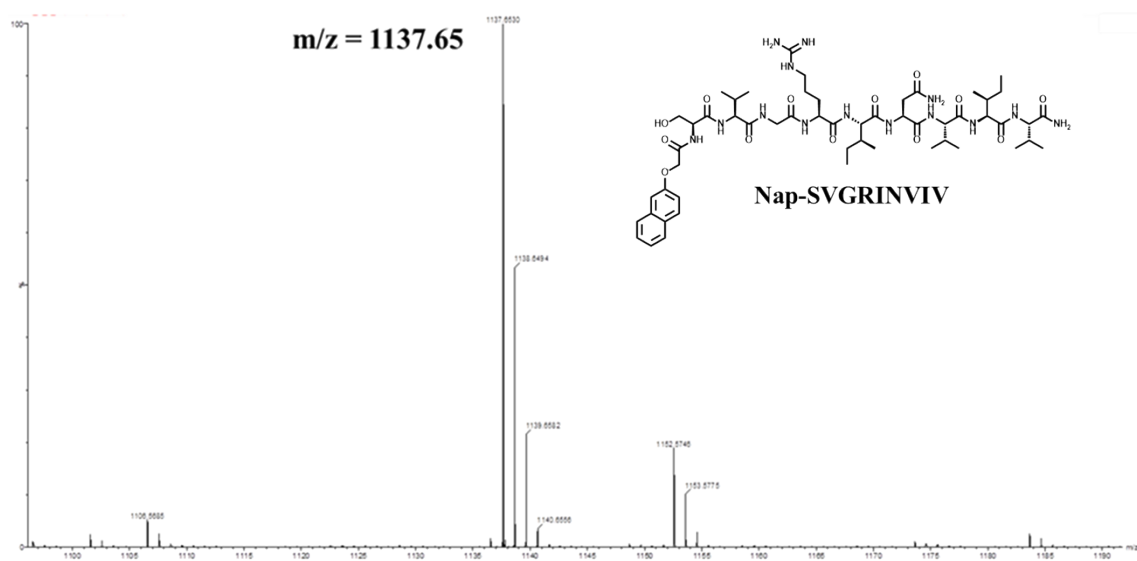

**Figure S4:** LC-MS spectra of scrambled peptide analyzed using ESI-MS technique.



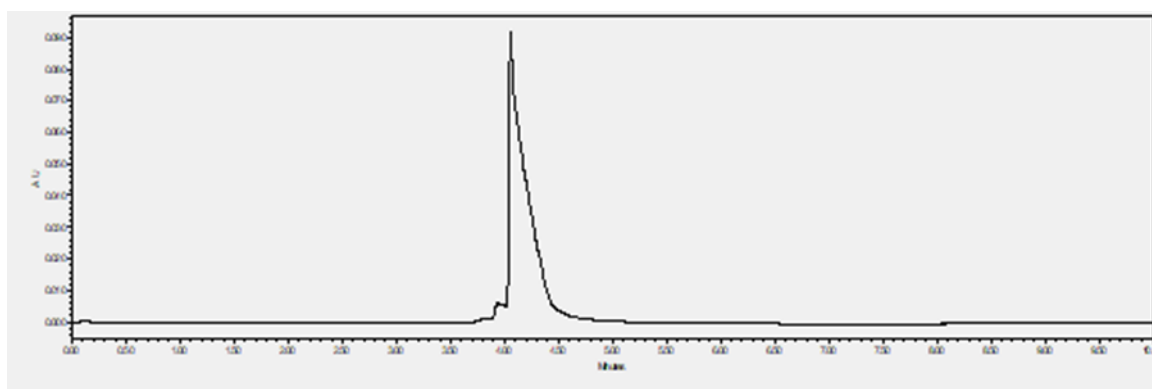

**Figure S5:** Reverse phase HPLC chromatogram of scrambled peptide sequence Nap-SVGRINVIV.

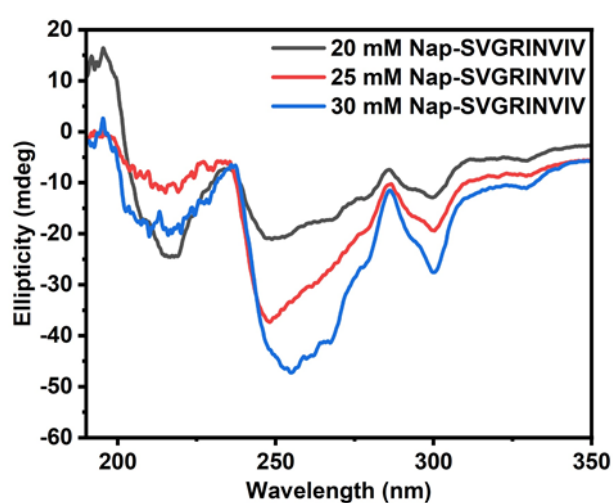

**Figure S6:** CD spectra of scrambled peptide hydrogel at different concentrations.

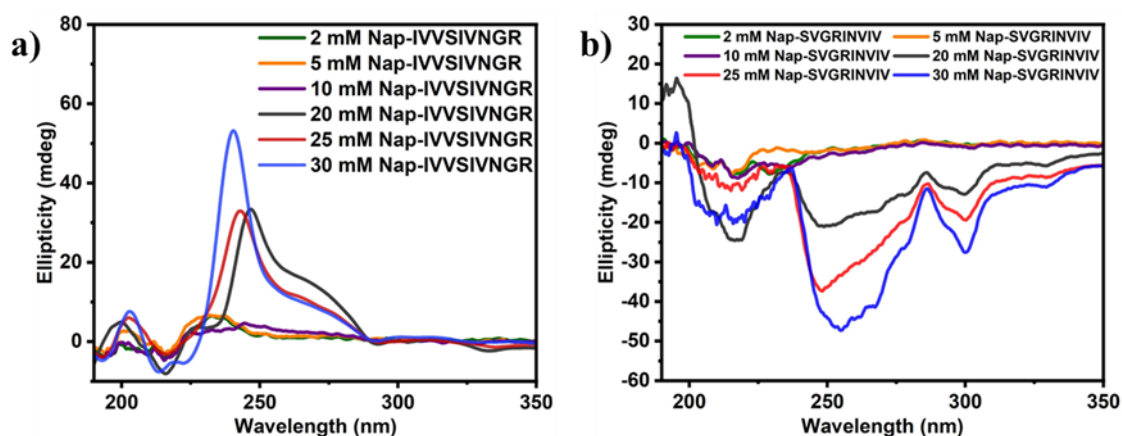

**Figure S7:** Comparison of the CD spectra of a) Nap-IVVSIVNGR and b) Nap-SVGRINVIV (scrambled peptide) at different concentration.

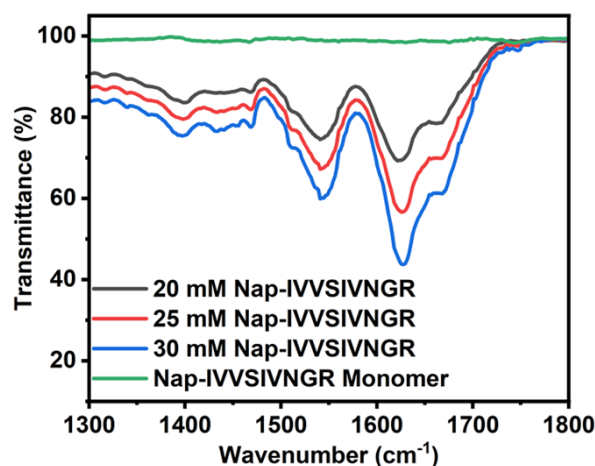

**Figure S8:** FTIR spectra of Nap-IVVSIVNGR peptide monomer powder along with freeze dried peptide hydrogels prepared at different concentrations.

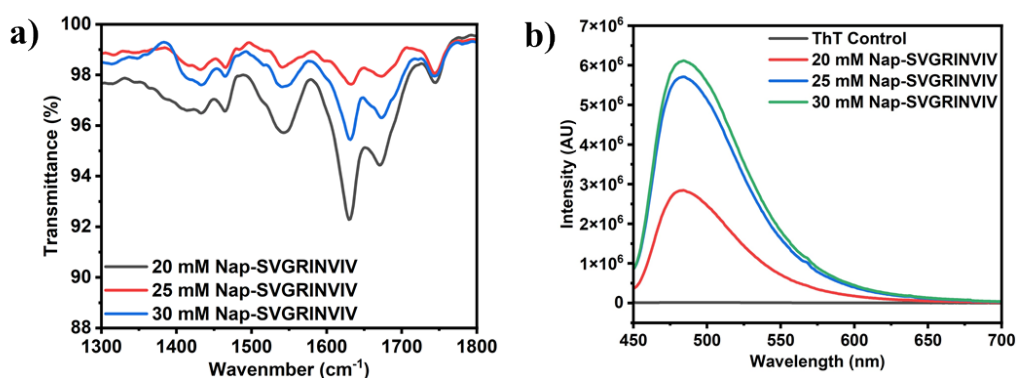

**Figure S9:** Secondary structure evaluation of the scrambled hydrogels at different peptide concentrations by various spectroscopic techniques: (a) FTIR- spectroscopic measurement, (b) ThT binding assay.

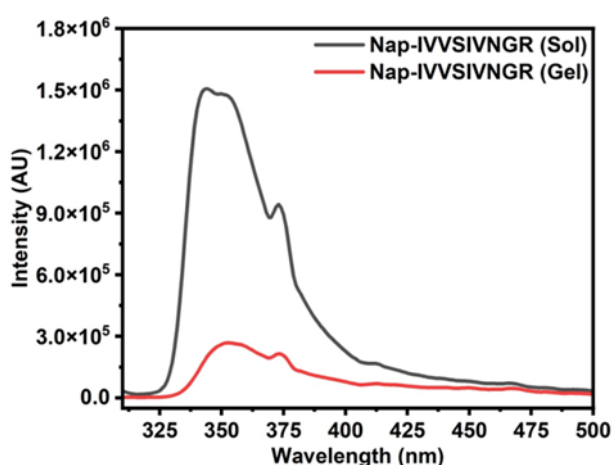

**Figure S10:** Representative fluorescence emission spectra of peptide amphiphile in sol and gel states, indicating self-assembly by the quenched monomeric emission of the naphthoxy group in the gel state.

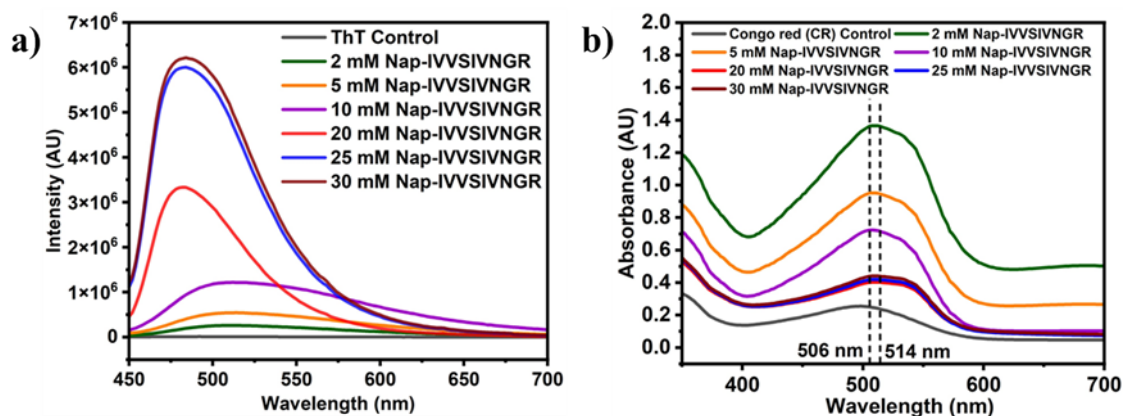

**Figure S11:** a) Tht binding assay and b) Congo red binding study of the peptide hydrogels at different concentrations.

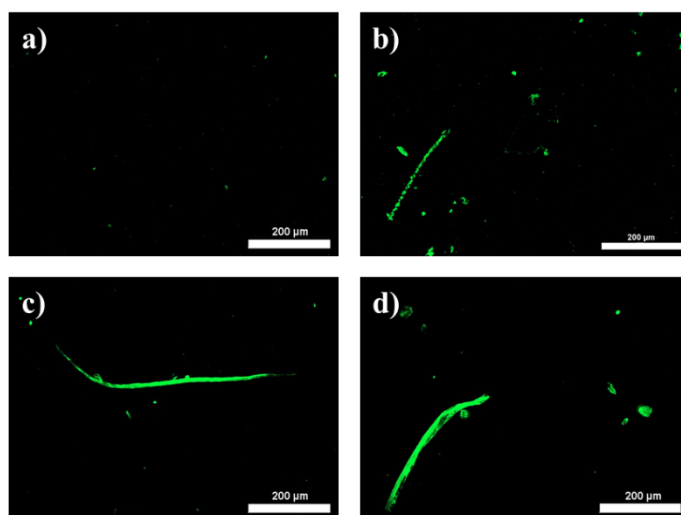

**Figure S12:** Fluorescence microscopic images of the ThT bound peptide hydrogels at different concentrations (a) ThT Control, (b) 20 mM, (c) 25 mM, and (d) 30 mM.

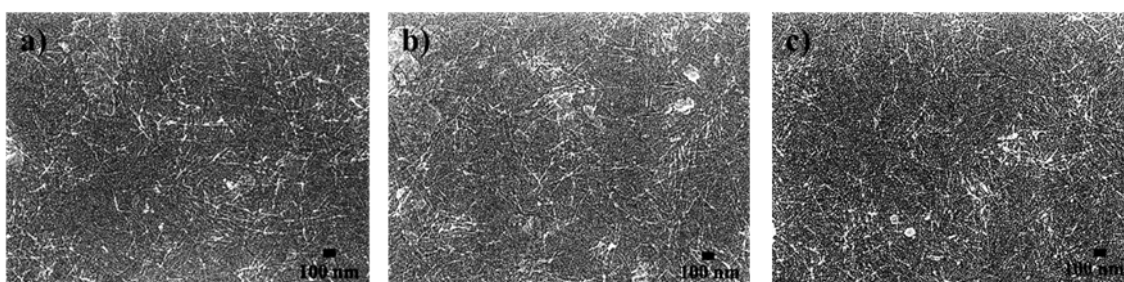

**Figure S13:** FESEM images of the peptide hydrogels at different peptide concentrations (a) 20 mM, (b) 25 mM, and (c) 30 mM Nap-IVVSIVNGR.

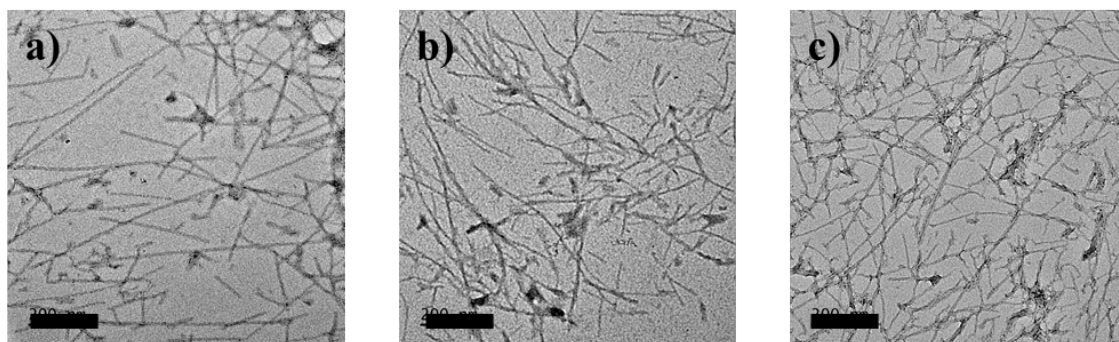

**Figure S14:** Morphological analysis of Nap-SVGRINVIV scrambled peptide hydrogels at different concentrations. TEM images of the gels prepared at: (a) 20 mM, (b) 25 mM, and (c) 30 mM of peptide concentration. Scale bar is 200 nm.

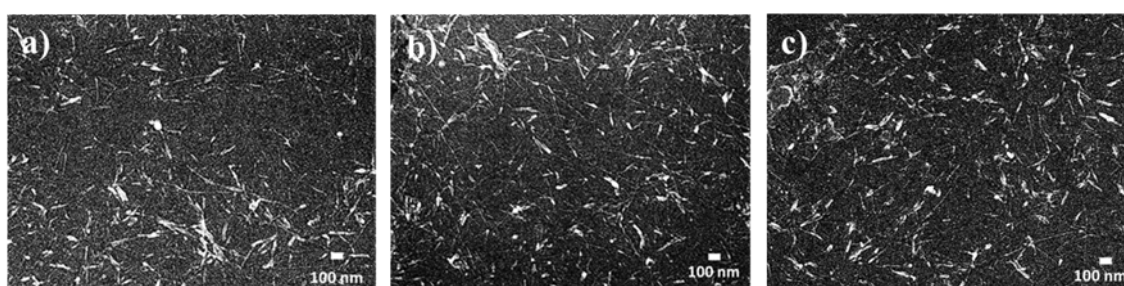

**Figure S15:** Morphological analysis of Nap-SVGRINVIV scrambled peptide hydrogels at different concentrations. FESEM images of the gels prepared at: (a) 20 mM, (b) 25 mM, and (c) 30 mM of peptide concentration. Scale bar is 100 nm.

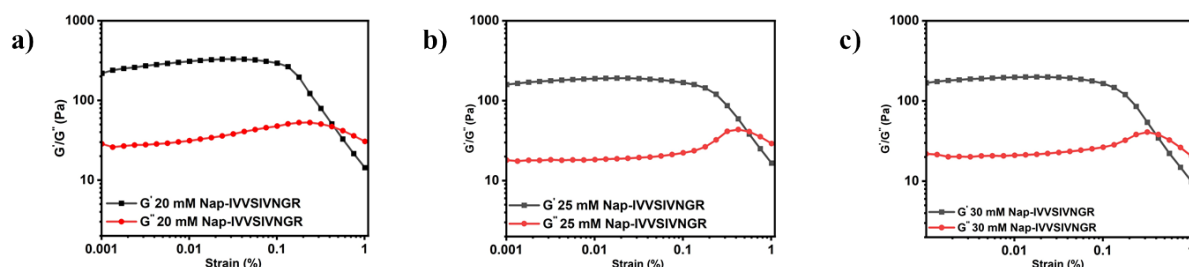

**Figure S16:** Strain sweep analysis of laminin-inspired peptide hydrogels at different concentrations (a) 20 mM, (b) 25 mM, and (c) 30 mM.

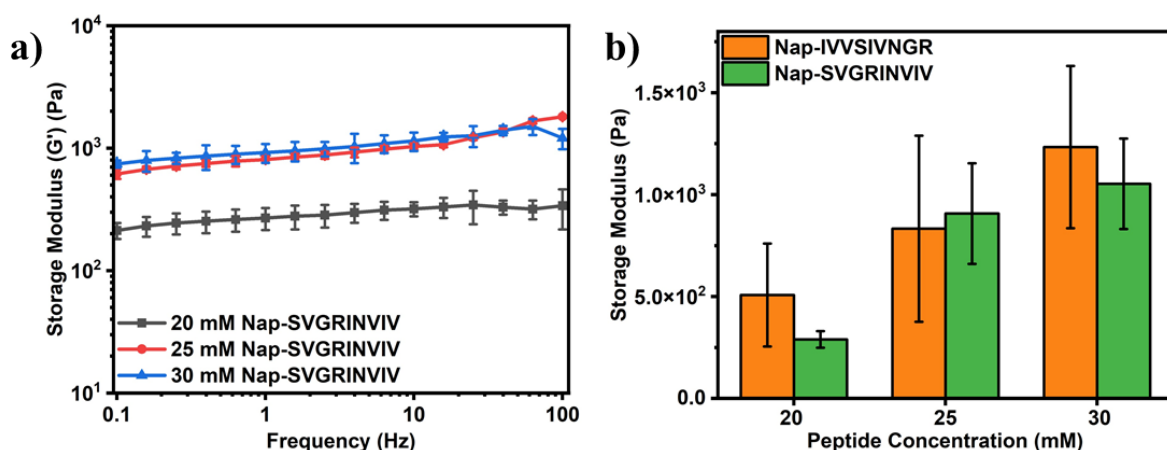

**Figure S17:** Mechanical strength analysis of the scrambled hydrogels at different concentration using a frequency sweep experiment.

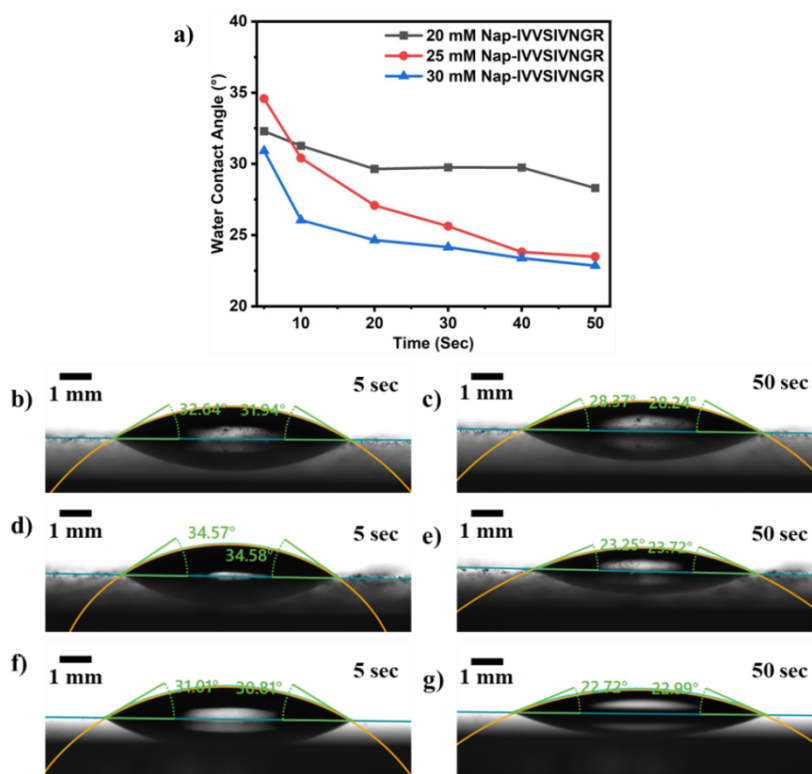

**Figure S18:** (a) Time-dependent variation in the water contact angle of Nap-IVVSIVNGR hydrogels. Images of the water droplets after landing on surfaces of 20 mM hydrogel at (b) 5 s, (c) 50s, 25 mM hydrogel at (d) 5 s, (e) 50 s, 30 mM hydrogel at (f) 5 s, (g) 50 s.



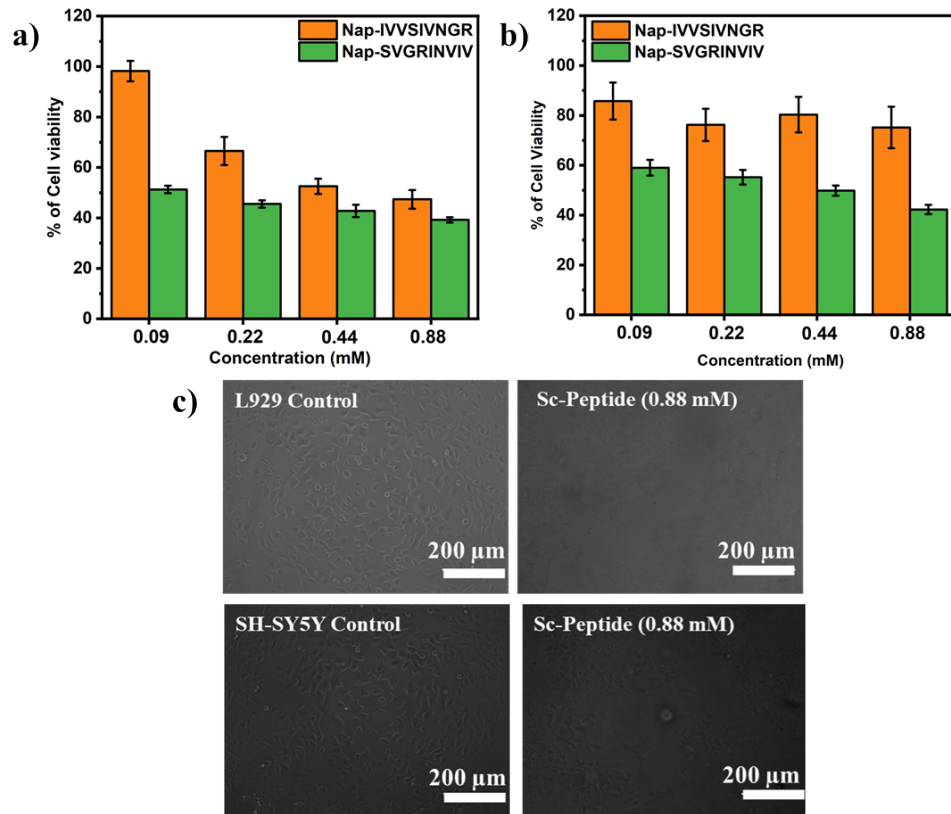

**Figure S19:** Determination of cellular viability of the scrambled peptide and comparison of cellular viability with the laminin inspired peptide Nap-IVVSIVNGR: Cellular viability of hydrogel on (a) L929 cells, (b) SH-SY5Y cells, and (c) Bright field images of both the cells in control and after 24h following treatment with peptide at 0.88 mM concentration.

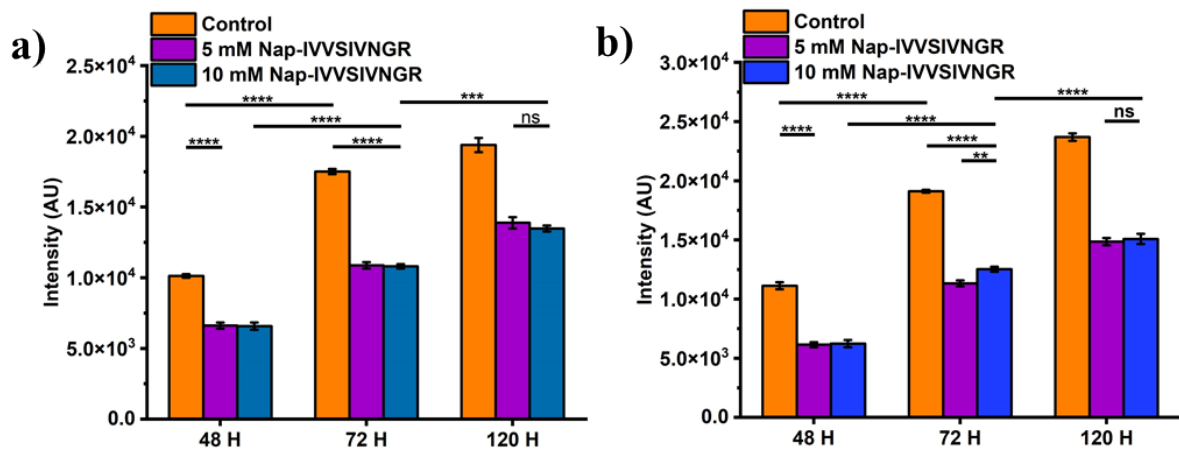

**Figure S20:** Cellular growth and proliferation study of the peptide at subgelation concentration on (a) L929 cells, (b) SH-SY5Y cells.

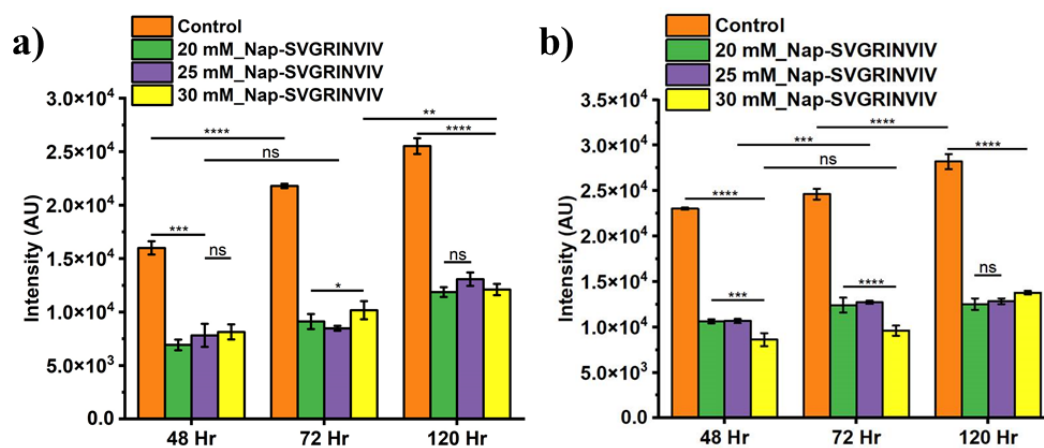

**Figure S21:** Cellular growth and proliferation study of the scrambled peptide hydrogels on (a) L929 cells, (b) SH-SY5Y cells.

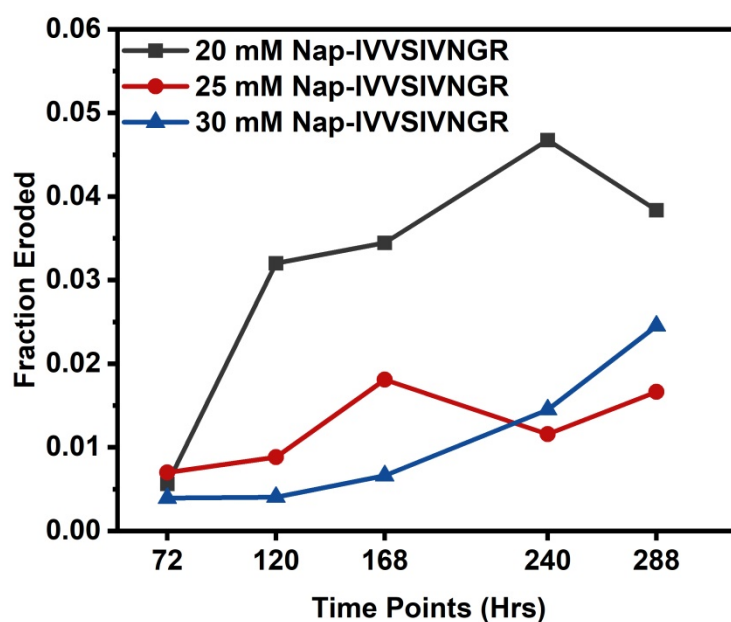

**Figure S22:** 3D stability study of the hydrogels in PBS having different peptide concentrations at different time points.

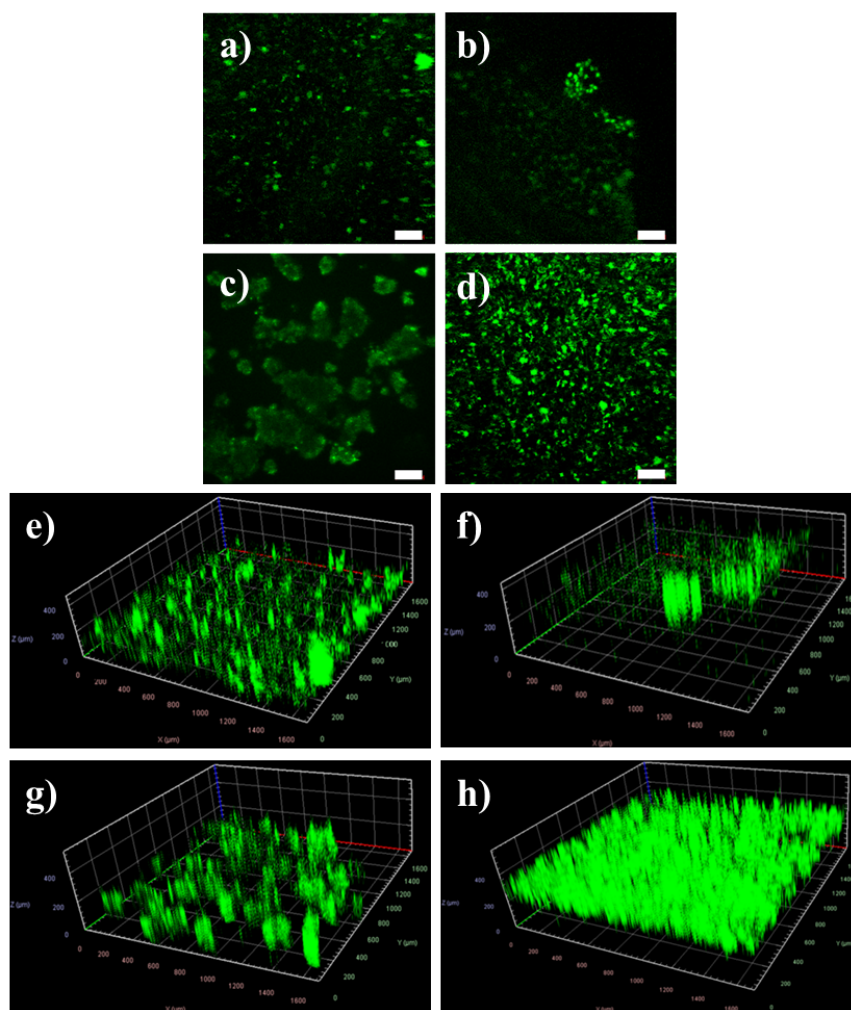

**Figure S23:** Confocal laser scanning microscopy images of SH-SY5Y cells in 3D cell culture conditions on (a) Control, (b) 20 mM Nap-IVVSIVNGR hydrogel, (c) 25 mM Nap-IVVSIVNGR hydrogel, (d) 30 mM Nap-IVVSIVNGR hydrogel. Scale bar is 200 μm, Z-stack rendering images of the L929 cells after live/dead staining in the 3-D cell culture conditions in case of (e) Control, (f) 20 mM Nap-IVVSIVNGR hydrogel, (g) 25 mM Nap-IVVSIVNGR hydrogel, (h) 30 mM Nap-IVVSIVNGR hydrogel. The scale bar is 200 μm.
